# Supplementary material for: Biomass-derived polyol esters as sustainable phase change materials for renewable energy storage
Source: Royal Society of Chemistry journal article supplement (doi:10.1039/d4gc03460k), 2024-01-01
Supplement: d4gc03460k1.xlsx [file d4gc03460k1.xlsx]

## Sheet: C18_TA_C18 (Zero Pass)
	Supplementary Information: Appendix 2				Summary of Zero Pass Metrics Toolkit
	Yield, conversion, selectivity, AE, RME
	Reactant (Limiting Reactant First)	Mass (g)	MW	Mol	Catalyst	Mass (g)	Reagent	Mass (g)	Reaction solvent	Volume (cm3)	Density (g ml-1)	Mass (g)	Work up chemical	Mass (g)	Workup solvent	Volume (cm3)	Density (g ml-1)	Mass (g)
	tartaric acid	0.516	150.087	0.00343801								0			etanol	70	0.789	55.23
	stearyl alcohol	5	270.49	0.018485								0						0
				#DIV/0!								0						0
				#DIV/0!								0						0
				#DIV/0!								0						0
				#DIV/0!								0						0
				#DIV/0!								0						0
	Total	5.516	420.577			0		0				0		0				55.23
									Flag
							Yield	70.5501	70.5501
							Conversion	100	100
							Selectivity	70.5501	70.5501					mass	mw	mol
							AE	155.864					Product	1.59	655.53	0.00242552
							RME	28.8252						mass
													Unreacted limiting reactant
	Solvents (Zero Pass)
	Highly hazardous solvents (Red flag for any of the following)							List Highly Hazardous Solvents Below
	Et2O, Benzene, CCl4, chloroform, DCE, nitromethane, CS2, HMPA
	Health and Safety (Zero Pass)
	Health & safety (Red flag for any of the following)						List substances plus the red flagged H-codes below
	Highly explosive			H200, H201, H202, H203
	Explosive thermal runaway			H240
	Fatally toxic			H300, H310, H330
	Mutagenic			H350
	Repro-toxic			H360
	Serious environmental implications			H420

## Sheet: C18_TA_C18 (First Pass)
	Supplementary Information: Appendix 2				Summary of First Pass Metrics Toolkit
	Yield, AE, RME, MI/PMI and OE
	Reactant (Limiting Reactant First)	Mass (g)	MW	Mol	Catalyst	Mass (g)	Reagent	Mass (g)	Reaction solvent	Volume (cm3)	Density (g ml-1)	Mass (g)	Work up chemical	Mass (g)	Workup solvent	Volume (cm3)	Density (g ml-1)	Mass (g)
	tartaric acid	0.516	150.087	0.00343801	amberlyst	1.5						0			etanol	70	0.789	55.23
	stearyl alcohol	5	270.49	0.018485								0						0
				#DIV/0!								0						0
				#DIV/0!								0						0
				#DIV/0!								0						0
				#DIV/0!								0						0
				#DIV/0!								0						0
	Total	5.516	420.577			1.5		0				0		0				55.23
										Flag
								Yield	70.5501	70.5501
								Conversion	100	100
								Selectivity	70.5501	70.5501					Mass	MW	Mol
								AE	155.864				Product		1.59	655.53	0.00242552
								RME	28.8252	OE	18.4938				mass
								PMI total	39.1484				Unreacted limiting reactant		0
								PMI Reaction	4.41258
								PMI reactants, reagents, catlyst	4.41258
								PMI reaction solvents	0
								PMI Workup	34.7358
								PMI Workup chemical	0
								PMI workup solvents	34.7358
	Solvents (First Pass)							List solvents below
	Preferred solvents		water, EtOH, nBuOH, AcOipr, AcOnBu, PhOMe, MeOH, tBuOH, BnOH, ethylene glycol, acetone, MEK, MIBK, AcOEt, sulfolane					without solvents
	Problematic solvents: (acceptable only if substitution does not offer advantages)		DMSO, cyclohexanone, DMPU, AcOH, Ac2O, Acetonitrile, AcOMe, THF, heptane, Me-cyclohexane, toluene, xylene, MTBE, cyclohexane, chlorobenzene, formic acid, pyridine, Me-THF
	Hazardous solvents: These solvents have significant health and/or safety concerns.		dioxane, pentane, TEA, diisopropyl ether, DME, DCM, DMF, DMA, NMP, methoxyethanol, hexane
	Highly hazardous solvents: The solvents which are agreed not to be used, even in screening		Et2O, Benzene, CCl4, chloroform, DCE, nitromethane, CS2, HMPA
	Catalyst/enzyme (First Pass)				Tick						Tick
	Catalyst or enzyme used, or reaction takes place without any catalyst/reagents.			Green Flag	+		Facile recovery of catalyst/enzyme			Green Flag	+
	Use of stoichiometric quantities of reagents			Amber Flag			catalyst/enzyme not recovered			Amber Flag
	Use of reagents in excess			Red Flag
	Critical elements
	Supply remaining	Flag colour	Note element
	5-50 years	Red Flag
	50-500 years	Amber Flag
	+500 years	Green Flag	+
	Energy (First Pass)			Tick						Tick
	Reaction run between 0 to 70oC		Green Flag	+		Reaction run at reflux			Red Flag
	Reaction run between -20 to 0 or 70 to 140oC		Amber Flag			Reaction run 5oC or more below the solvent boiling point			Green Flag	+
	Reaction run below -20 or above 140oC		Red Flag
	Batch/flow			Tick		Work Up				List
	Flow	Green Flag				quenching			Green Flag	filtration, crystallisation, recrystallisation
	Batch	Amber Flag		+		filtration
						centrifugation
						crystallisation
						Low temperature distillation/evaporation/ sublimation (< 140 oC at atmospheric pressure)
						solvent exchange, quenching into aqueous solvent			Amber Flag
						chromatography/ion exchange			Red Flag
						high temperature distillation/evaporations/sublimation (> 140 oC at atmospheric pressure)
						multiple recrystallisation
								List substances and H-codes		List substances and H-codes		List substances and H-codes
	Health & safety
		Red Flag		Amber Flag		Green Flag						tartaric acid (H12)
	Highly explosive	H200, H201, H202, H203		H205, H220, H224		If no red or amber flagged H codes present then green flag						stearyl alcohol
	Explosive thermal runaway	H230, H240, H250		H241								amberlyst
	Toxic	H300, H310, H330		H301, H311, H331,								ethanol (H225)
	Long Term toxicity	H340, H350, H360, H370, H372		H341, H351, H361, H371, H373
	Environmental implications	H400, H410, H411, H420		H401, H412
	Use of chemicals of environmental concern					List substances of very high concern
	Chemical identified as Substances of Very High Concern by ChemSec which are utilised				Red Flag
