# Supplementary material for: Biomass-derived polyol esters as sustainable phase change materials for renewable energy storage
Source: Royal Society of Chemistry journal article supplement (doi:10.1039/d4gc03460k), 2024-01-01
Supplement: d4gc03460k2.pdf [file d4gc03460k2.pdf]

## Electronic supplementary information (ESI) for

### Biomass-derived polyol esters as sustainable phase change materials for renewable energy storage

Magdalena Gwóźdź,<sup>a</sup> Marta Markiewicz,<sup>b</sup> Stefan Stolte,<sup>b</sup> Anna Chrobok,<sup>a</sup> David R. Turner,<sup>c</sup> Karolina Matuszek,<sup>\*c</sup> and Alina Brzęczek-Szafran<sup>\*a</sup>

Correspondence to: [Karolina.Matuszek@monash.edu](mailto:Karolina.Matuszek@monash.edu), [Alina.Brzczek-Szafran@polsl.pl](mailto:Alina.Brzczek-Szafran@polsl.pl)

## List of contents

|                                                                                                      |    |
|------------------------------------------------------------------------------------------------------|----|
| List of figures .....                                                                                | 2  |
| List of tables .....                                                                                 | 3  |
| Materials and methods.....                                                                           | 3  |
| <i>Materials</i> .....                                                                               | 3  |
| <i>General procedure of synthesis diesters derivatives of L-(+) tartaric acid</i> .....              | 3  |
| (R, R)-di-n-dodecyltartrate .....                                                                    | 3  |
| (R, R)-di-n-hexadecyltartrate .....                                                                  | 4  |
| (R, R)-di-n-octadecyltartrate .....                                                                  | 4  |
| (R, R)-di-n-docanosyltartrate .....                                                                  | 4  |
| <i>General procedure of synthesis diesters derivatives of mucic acid</i> .....                       | 4  |
| Di-n-dodecylmucate .....                                                                             | 5  |
| Di-n-octadecylmucate .....                                                                           | 5  |
| NMR spectra.....                                                                                     | 5  |
| TGA.....                                                                                             | 11 |
| DSC .....                                                                                            | 15 |
| FTIR .....                                                                                           | 17 |
| X-ray Crystallography .....                                                                          | 18 |
| <i>Extended crystal packing</i> .....                                                                | 18 |
| <i>Crystal data and refinement details</i> .....                                                     | 20 |
| <i>Hydrogen bond tables generated from Olex2</i> .....                                               | 21 |
| <i>Distances and angles of hydrogen bonds calculated through the Mercury 2021.2.0 software</i> ..... | 21 |
| Hirshfeld surface interactions breakdown .....                                                       | 22 |
| Literature .....                                                                                     | 24 |

## List of figures

|                                                                                               |    |
|-----------------------------------------------------------------------------------------------|----|
| Figure S 1 <sup>1</sup> HNMR spectrum of (R,R)-di-n-dodecyltartrate .....                     | 5  |
| Figure S 2 <sup>13</sup> CNMR spectrum of (R,R)-di-n-dodecyltartrate .....                    | 6  |
| Figure S 3 <sup>1</sup> HNMR spectrum of (R,R)-di-n-hexadecyltartrate.....                    | 6  |
| Figure S 4 <sup>13</sup> CNMR spectrum of (R,R)-di-n-hexadecyltartrate.....                   | 7  |
| Figure S 5 <sup>1</sup> HNMR spectrum of (R,R)-di-n-octadecyltartrate.....                    | 7  |
| Figure S 6 <sup>13</sup> CNMR spectrum of (R,R)-di-n-octadecyltartrate .....                  | 8  |
| Figure S 7 <sup>1</sup> HNMR spectrum of (R,R)-di-n-docanosyltartrate.....                    | 8  |
| Figure S 8 <sup>13</sup> CNMR spectrum of (R,R)-di-n-docanosyltartrate.....                   | 9  |
| Figure S 9 <sup>1</sup> HNMR spectrum of di-n-laurylmucate.....                               | 9  |
| Figure S 10 <sup>1</sup> HNMR spectrum of di-n-stearylmucate .....                            | 10 |
| Figure S 11 <sup>1</sup> HNMR spectra of C18_TA_C18 before and after 500 th cycles .....      | 10 |
| Figure S 12 Comparison of C12_MA_C12 <sup>1</sup> H NMR spectra before and after melting..... | 11 |
| Figure S 13 TGA of L (+)-Tartaric Acid.....                                                   | 11 |
| Figure S 14 TGA of (R,R)-di-n-dodecyltartrate .....                                           | 12 |
| Figure S 15 TGA of (R,R)-di-n-hexadecyltartrate.....                                          | 12 |
| Figure S 16 TGA of (R,R)-di-n-octadecyltartrate .....                                         | 13 |
| Figure S 17 TGA of (R,R)-di-n-docanosyltartrate.....                                          | 13 |
| Figure S 18 TGA of di-n-hexadecylmucate.....                                                  | 14 |

|                                                                                                                                                                         |    |
|-------------------------------------------------------------------------------------------------------------------------------------------------------------------------|----|
| Figure S 19 TGA of di-n-octadecylmucate.....                                                                                                                            | 14 |
| Figure S 20 DSC curve of L(+) - Tartaric Acid.....                                                                                                                      | 15 |
| Figure S 21 DSC curves of tartaric acid diester series .....                                                                                                            | 15 |
| Figure S 22 DSC curves of mucic acid diester series.....                                                                                                                | 16 |
| Figure S 23 DSC curve of C22_TA_C22, at a ramp rate 1° min <sup>-1</sup> .....                                                                                          | 16 |
| Figure S 24 FT-IR analysis of tartaric acid and mucic acid diester series.....                                                                                          | 17 |
| Figure S 25 FT-IR analysis of C12_MA_C12.....                                                                                                                           | 17 |
| Figure S 26 FT-IR analysis of C18_TA_C18 before and after 500 th cycles .....                                                                                           | 18 |
| Figure S 27 Extended crystal packing of C12_TA_C12 down the a (a), b (b), c (c) axis .....                                                                              | 18 |
| Figure S 28 Extended crystal packing of C18_TA_C18 down the a (a), b (b), c (c) axis .....                                                                              | 19 |
| Figure S 29 Extended crystal packing of C12_TA_C12 down the b axis .....                                                                                                | 19 |
| Figure S 30 Extended crystal packing of C18_TA_C18 down the b axis .....                                                                                                | 19 |
| Figure S 31 Hirshfeld surface interactions breakdown for TA. a) 3D Hirshfeld surface b) fingerplot c) percentage of interactions.....                                   | 22 |
| Figure S 32 Hirshfeld surface interactions breakdown for C <sub>12</sub> _TA_C <sub>12</sub> . a) 3D Hirshfeld surface b) fingerplot c) percentage of interactions..... | 23 |
| Figure S 33 Hirshfeld surface interactions breakdown for C <sub>18</sub> _TA_C <sub>18</sub> . a) 3D Hirshfeld surface b) fingerplot c) percentage of interactions..... | 23 |

## List of tables

|                                                                                                                                       |    |
|---------------------------------------------------------------------------------------------------------------------------------------|----|
| Table S 1 Crystal data and structure refinement for C <sub>12</sub> _TA_C <sub>12</sub> and C <sub>18</sub> _TA_C <sub>18</sub> ..... | 20 |
| Table S 2 Distance and angles of strong hydrogen bond in C <sub>12</sub> _TA_C <sub>12</sub> .....                                    | 21 |
| Table S 3 Distance and angles of strong hydrogen bond in C <sub>18</sub> _TA_C <sub>18</sub> .....                                    | 21 |
| Table S 4 Distance and angles of hydrogen bond in C <sub>12</sub> _TA_C <sub>12</sub> .....                                           | 21 |
| Table S 5 Distance and angles of hydrogen bond in C <sub>18</sub> _TA_C <sub>18</sub> .....                                           | 22 |
| Table S 6 The state of the art presenting organic PCMs .....                                                                          | 23 |

## Materials and methods

### Materials

The long-chain sugar acid esters of L-(+)-Tartaric acid (>99.5%) were synthesized using 1-dodecanol (>98%), 1-hexadecanol (>99%), 1-octadecanol (>99%), and 1-docanozol (>99%) from Sigma-Aldrich. The reaction also used Amberlyst<sup>TM</sup>-15 catalyst commercially available from Merck. Ethanol was used for crystallization to purify the final product of the synthesis. The all reagents were used without purification.

### General procedure of synthesis diesters derivatives of L-(+) tartaric acid

L-(+)-tartaric acid (0.5 g, 3.44 mmol), fatty alcohol (5 g, 0,0019 mol) and Amberlyst 15 (1.5 g) were combined in a round-bottom flask. The reaction mixture was stirred at 70°C for 24 hours. After the reaction was completed, 40 ml ethanol was added and the mixture was heated to dissolve the product. The Amberlyst 15 was separated by hot filtration. After cooling to room temperature, the crude product crystallized immediately and was filtered off, followed by recrystallization from ethanol (30 ml).

### (R, R)-di-n-dodecyltartrate

C<sub>28</sub>H<sub>52</sub>O<sub>4</sub>; 452.39 g mol<sup>-1</sup>. Yield: 65%; white powder; mp = 67 °C (lit. 64–66 °C<sup>1</sup>)

**<sup>1</sup>H NMR** (400 MHz, CDCl<sub>3</sub>) δ 4.52 (d, *J* = 6.0 Hz, 2H), 4.26 (td, *J* = 6.8, 3.1 Hz, 4H), 3.15 (d, *J* = 7.1 Hz, 2H), 1.68 (dt, *J* = 8.1, 6.5 Hz, 4H), 1.41 – 1.20 (m, 32H), 0.92 – 0.82 (m, 6H).

**<sup>13</sup>C NMR** (101 MHz, CDCl<sub>3</sub>) δ 171.65, 77.23, 72.03, 66.64, 31.92, 29.63, 29.56, 29.48, 29.35, 29.18, 28.52, 25.73, 22.69, 14.12.

**ESI-MS:** [M+ H]<sup>+</sup> calcd.: 487.3999; found: 487.3996,

### **(R, R)-di-n-hexadecyltartrate**

C<sub>36</sub>H<sub>70</sub>O<sub>6</sub>; 598.948 g mol<sup>-1</sup>. Yield: 68%; white powder; mp = 77 °C (lit. 78–79 °C<sup>1</sup>)

**<sup>1</sup>H NMR** (400 MHz, CDCl<sub>3</sub>) δ 4.52 (s, 2H), 4.26 (td, *J* = 6.8, 3.2 Hz, 4H), 1.68 (dt, *J* = 8.1, 6.6 Hz, 4H), 1.26 (s, 52H), 1.00 – 0.71 (m, 6H).

**<sup>13</sup>C NMR** (101 MHz, CDCl<sub>3</sub>) δ 170.61, 76.19, 70.96, 65.63, 30.91, 28.67, 28.64, 28.61, 28.54, 28.46, 28.35, 28.16, 27.49, 24.70, 21.68, 13.11.

**ESI-MS:** [M+ H]<sup>+</sup> calcd.: 599.5251; found: 599.5238, [M+Na]<sup>+</sup> calcd.: 621.5070; found: 621.5069

### **(R, R)-di-n-octadecyltartrate**

C<sub>40</sub>H<sub>78</sub>O<sub>6</sub>; 655.056 g mol<sup>-1</sup>. Yield: 70%; white powder; mp = 82 °C

**<sup>1</sup>H NMR** (400 MHz, CDCl<sub>3</sub>) δ 4.45 (s, 2H), 4.18 (tt, *J* = 7.0, 3.5 Hz, 4H), 3.04 (s, 2H), 1.62 (p, *J* = 6.8 Hz, 4H), 1.19 (s, 50H), 0.81 (t, *J* = 6.8 Hz, 6H).

**<sup>13</sup>C NMR** (101 MHz, CDCl<sub>3</sub>) δ 170.62, 76.19, 70.98, 65.62, 30.91, 28.68, 28.65, 28.62, 28.55, 28.46, 28.35, 28.16, 27.49, 24.70, 21.68, 13.11.

**ESI-MS:** [M+ H]<sup>+</sup> calcd.: 655.5876 ; found: 656.5861, [M+Na]<sup>+</sup> calcd.: 678.5690, found: 678.5693

### **(R, R)-di-n-docanosyltartrate**

C<sub>48</sub>H<sub>94</sub>O<sub>6</sub>; 767.3 g mol<sup>-1</sup>. Yield: 60%; white powder; mp = 94 °C

**<sup>1</sup>H NMR** (400 MHz, CDCl<sub>3</sub>) δ 4.52 (s, 2H), 4.26 (td, *J* = 6.7, 3.2 Hz, 4H), 1.69 (dq, *J* = 8.0, 6.6 Hz, 4H), 1.26 (s, 76H), 0.93 – 0.79 (m, 6H).

**<sup>13</sup>C NMR** (101 MHz, CDCl<sub>3</sub>) δ 171.65, 77.23, 72.02, 66.65, 31.94, 29.72, 29.69, 29.68, 29.65, 29.58, 29.50, 29.38, 29.19, 28.53, 25.73, 22.71, 20.53, 14.13.

**ESI-MS:** [M+Na]<sup>+</sup> calcd.: 789.6948; found: 789.6944

## **General procedure of synthesis diesters derivatives of mucic acid**

In a round-bottom flask, mucic acid dibutyl ester (which was described according to the literature)<sup>2</sup> (22.5 g, 0.15 mol), fatty alcohol (30 g, 0.41 mol), and p-toluenesulfonic acid (1.5 g, 5 mol% MA) as a catalyst were subjected to reflux for 24 hours. After cooling, the n-butanol was added. The resulting residue was then filtered and subjected to recrystallization from water and next from THF or pyridine, yielding a white powder.

### Di-n-dodecylmucate

C<sub>38</sub>H<sub>74</sub>O<sub>8</sub>; 658.5 g mol<sup>-1</sup>, Yield: 52%; white powder; mp = 137 °C

<sup>1</sup>H NMR (400 MHz, DMSO) δ 4.92 – 4.63 (m, 4H), 4.29 (d, *J* = 7.7 Hz, 2H), 4.05 (d, *J* = 8.2 Hz, 4H), 1.58 (d, *J* = 8.1 Hz, 4H), 1.24 (s, 18H), 0.98 – 0.75 (m, 6H).

ESI-MS: [M+Na]<sup>+</sup> calcd.: 681.5261 ; found: 681.5178

### Di-n-octadecylmucate

C<sub>42</sub>H<sub>82</sub>O<sub>8</sub>; 714.6 g mol<sup>-1</sup>, Yield: 40%; white powder; mp = 124 °C

<sup>1</sup>H NMR (400 MHz, DMSO) δ 4.77 (dd, *J* = 20.2, 11.2 Hz, 4H), 4.24 (t, *J* = 9.1 Hz, 2H), 4.12 – 3.92 (m, 4H), 3.74 (s, 2H), 1.54 (m, 4H), 1.19 (m, 50H), 0.92 – 0.73 (m, 6H).

ESI-MS: [M+Na]<sup>+</sup> calcd.: 737.5908; found: 737.5419

## NMR spectra

### Tartaric acid series

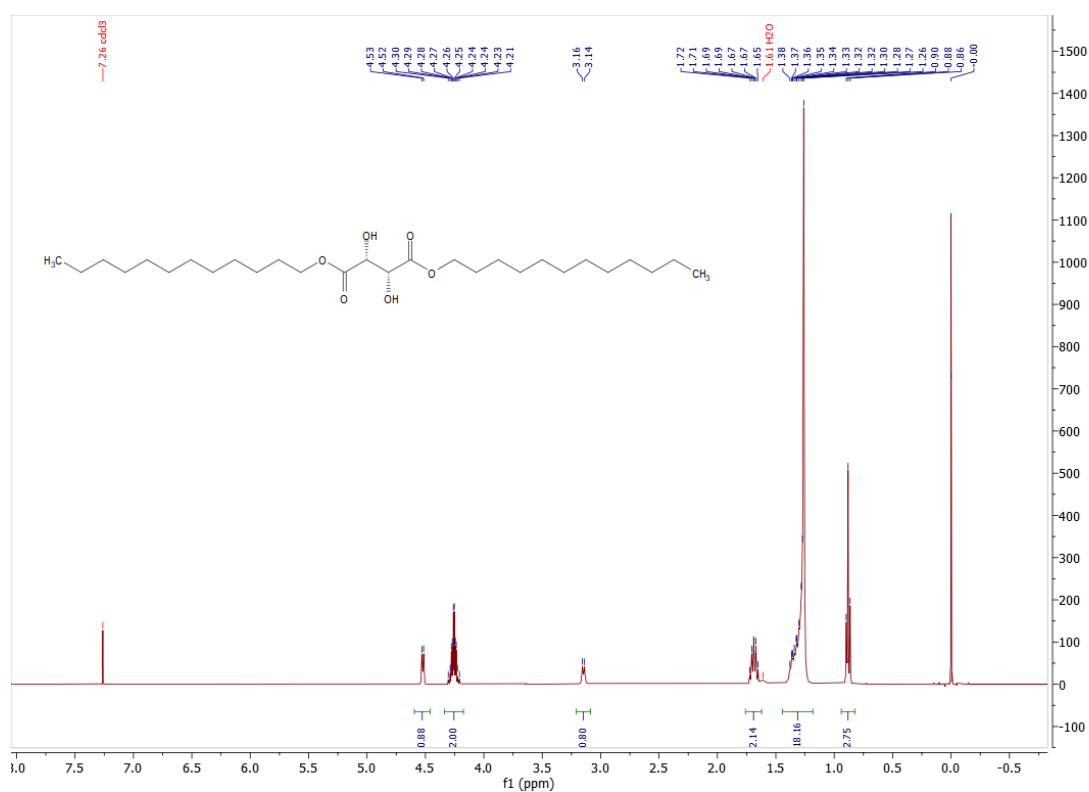

Figure S 1 <sup>1</sup>H NMR spectrum of (R,R)-di-n-dodecyltartrate

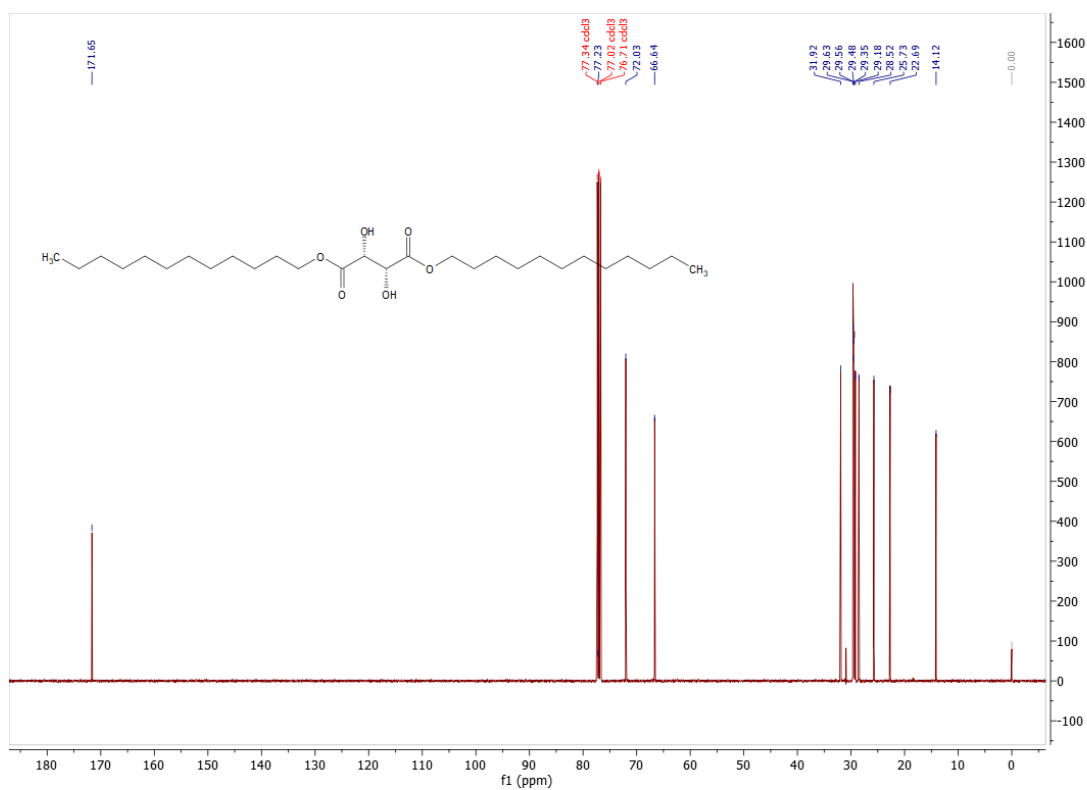

Figure S 2  $^{13}\text{C}$ NMR spectrum of (R,R)-di-n-dodecyltartrate

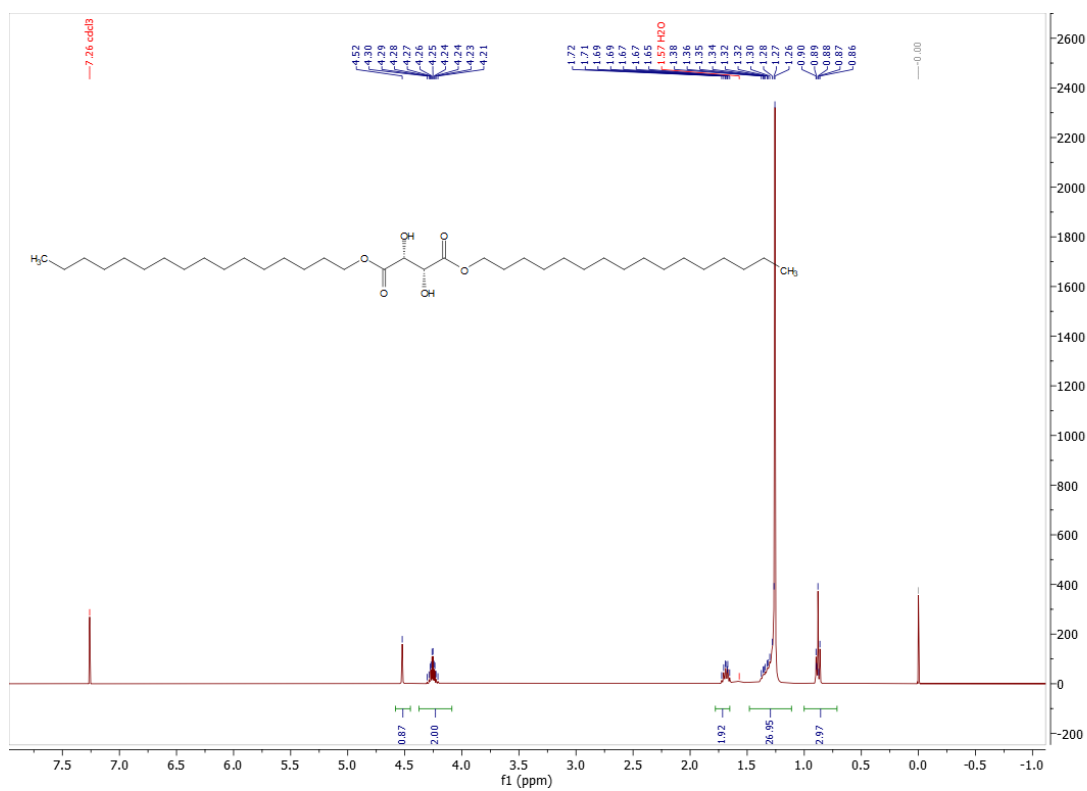

Figure S 3  $^1\text{H}$ NMR spectrum of (R,R)-di-n-hexadecyltartrate

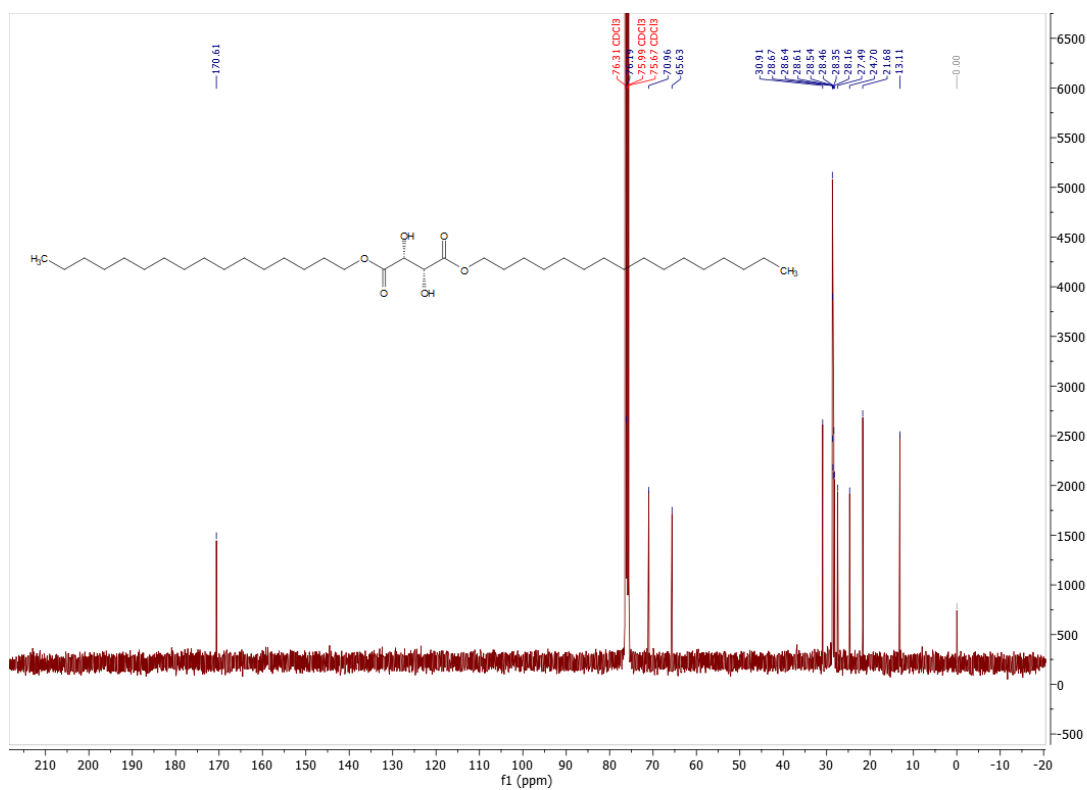

Figure S 4  $^{13}\text{C}$ NMR spectrum of *(R,R)*-di-*n*-hexadecyltartrate

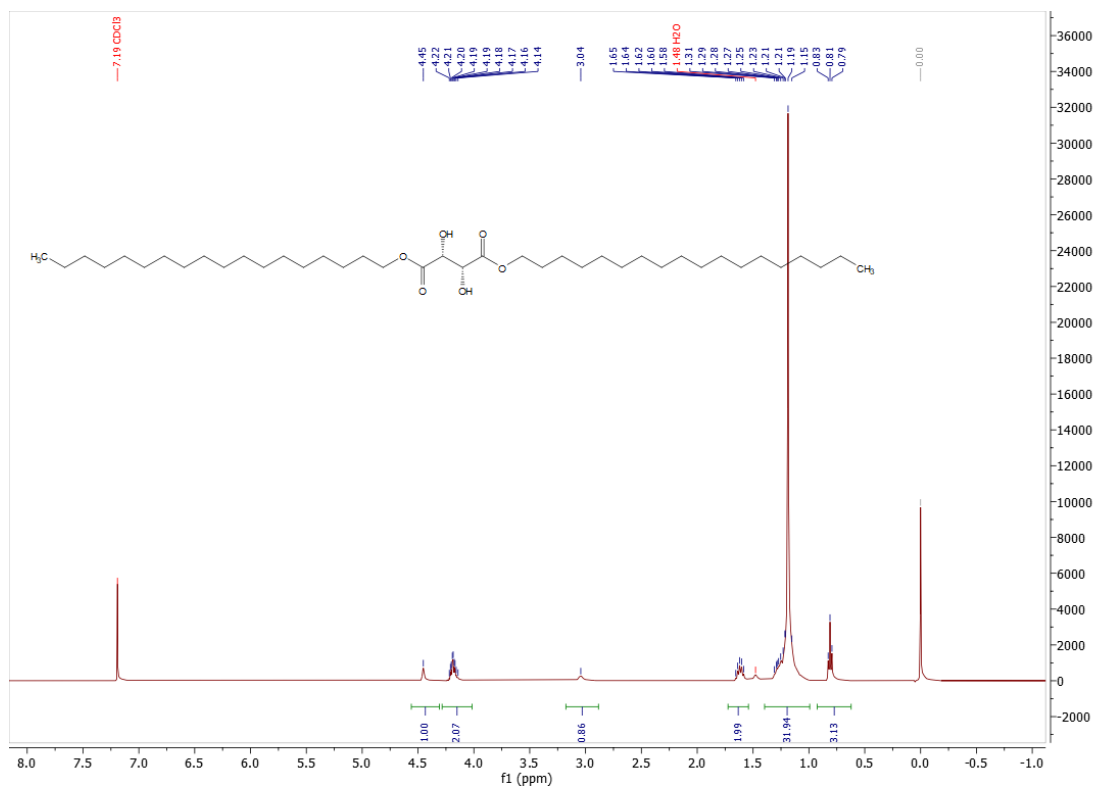

Figure S 5  $^1\text{H}$ NMR spectrum of *(R,R)*-di-*n*-octadecyltartrate

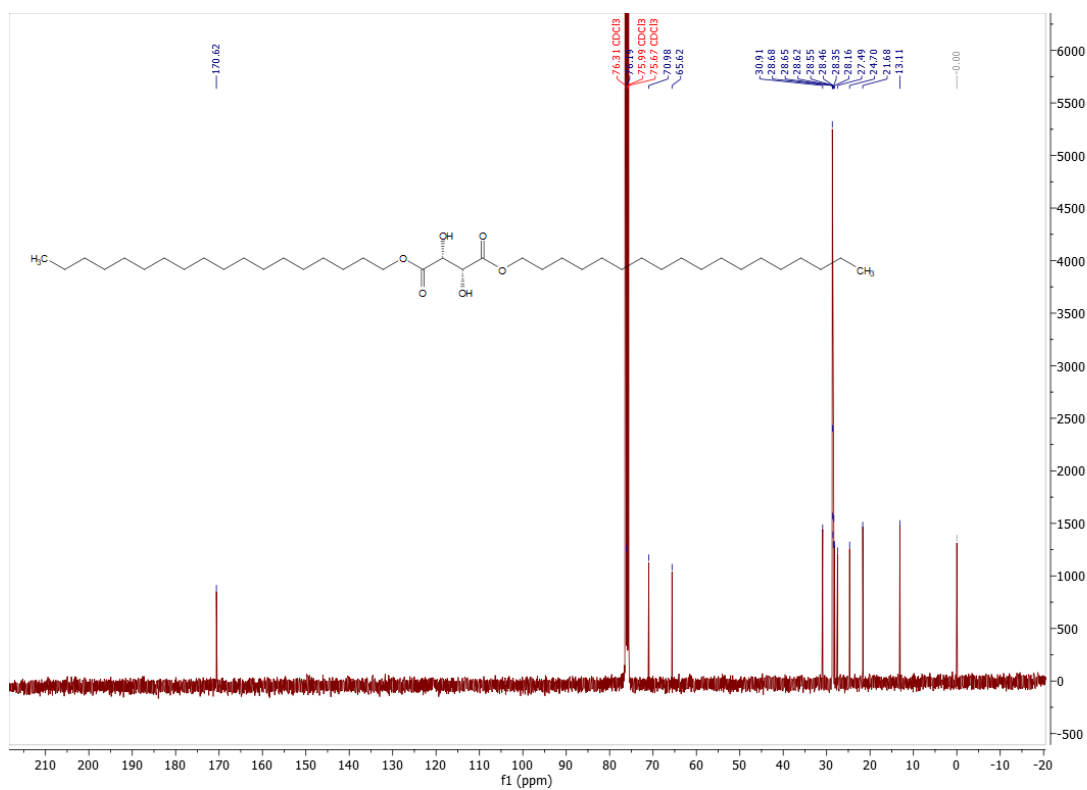

Figure S 6  $^{13}\text{C}$ NMR spectrum of (R,R)-di-n-octadecyltartrate

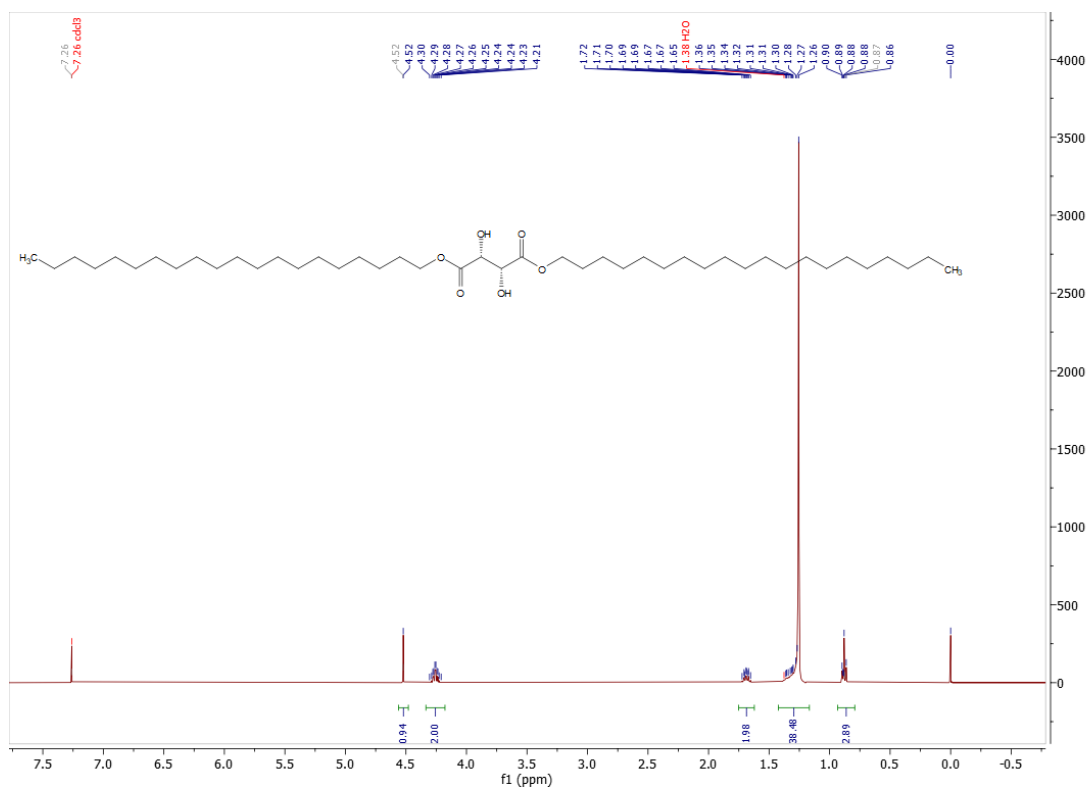

Figure S 7  $^1\text{H}$ NMR spectrum of (R,R)-di-n-docanosyltartrate



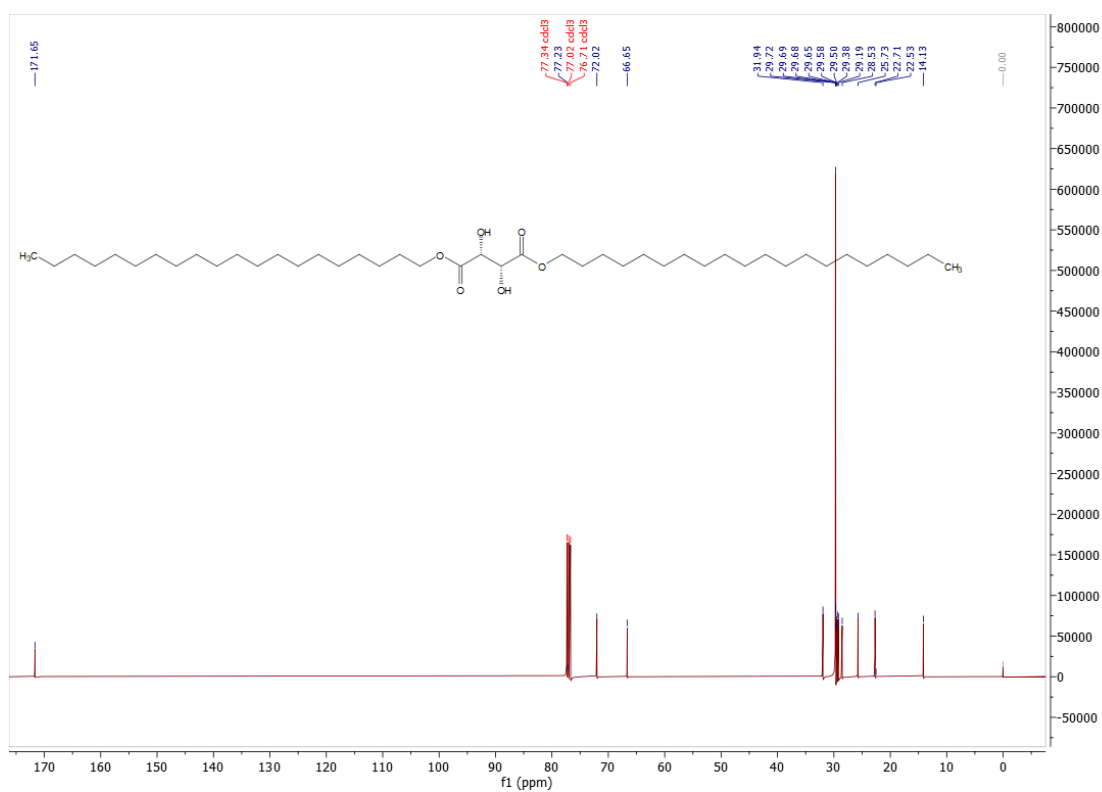

Figure S 8  $^{13}\text{C}$ NMR spectrum of *(R,R)*-di-*n*-docanosyltartrate

### Mucic acid series

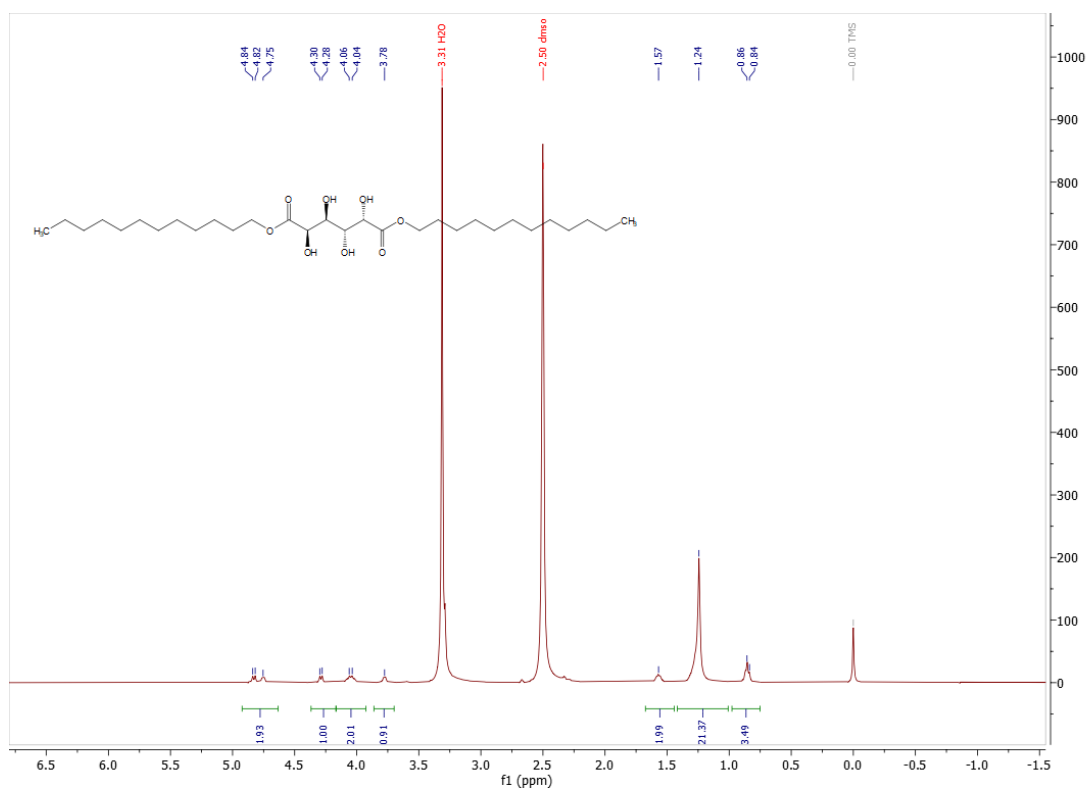

Figure S 9  $^1\text{H}$ NMR spectrum of di-*n*-laurylmucate

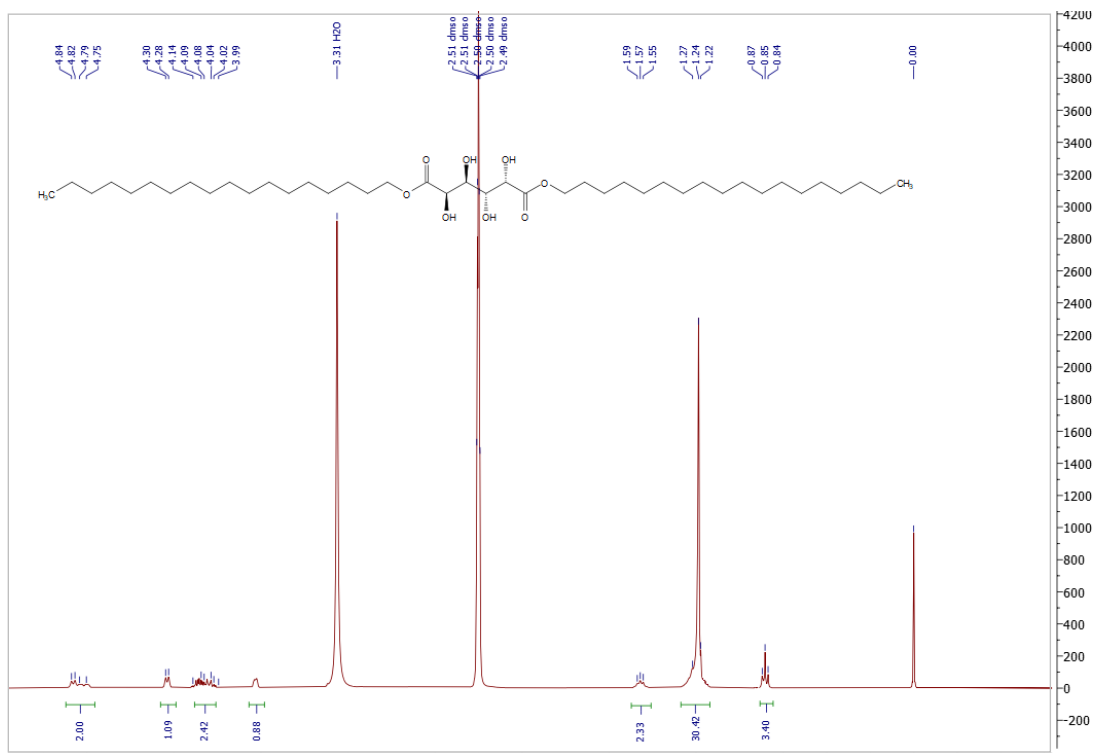

Figure S 10  $^1\text{H}$ NMR spectrum of di-n-stearylmucate

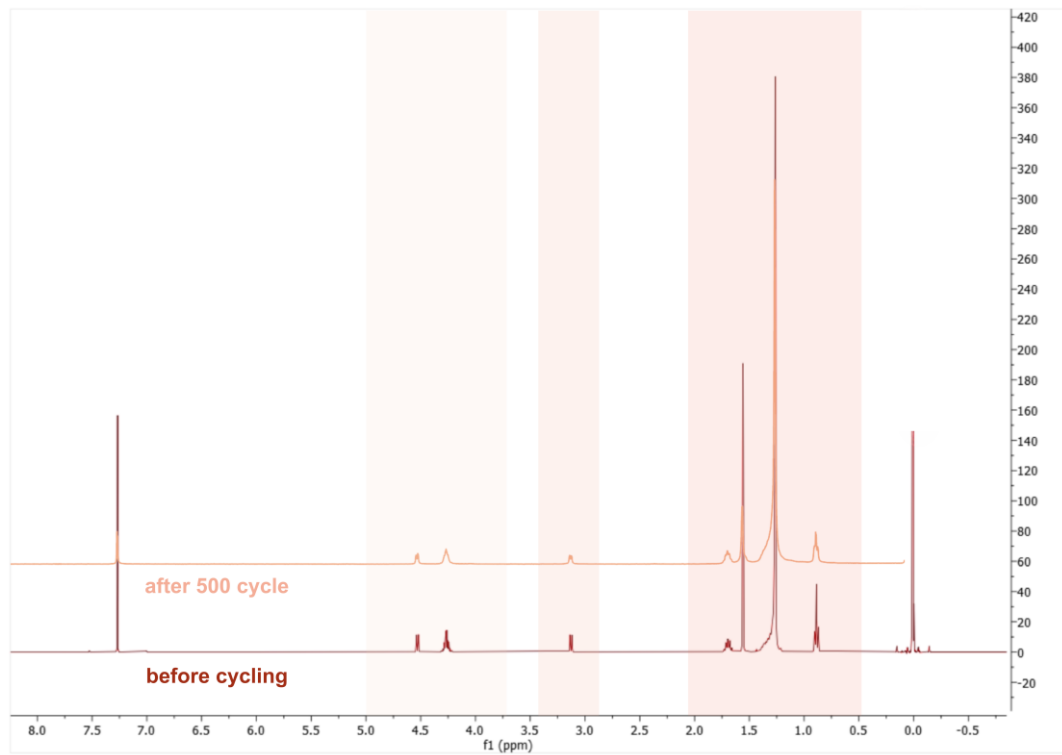

Figure S 11  $^1\text{H}$ NMR spectra of C18\_TA\_C18 before and after 500 th cycles

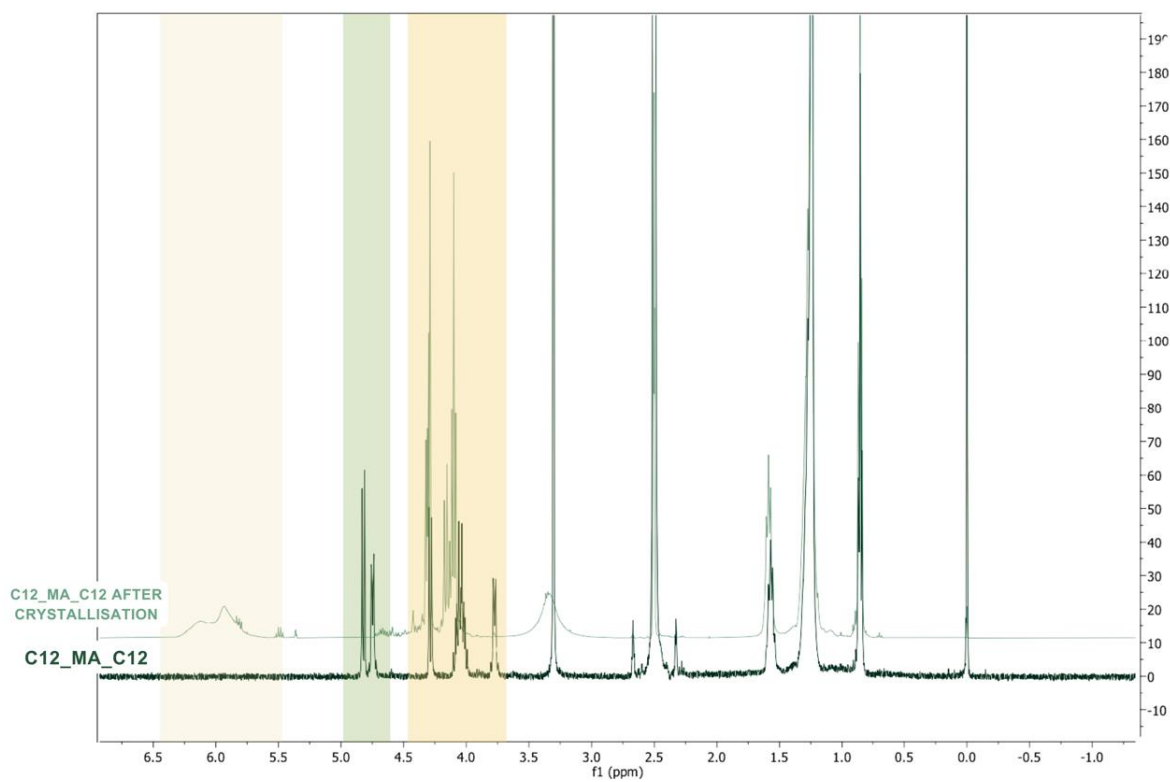

Figure S 12 Comparison of C12\_MA\_C12 <sup>1</sup>H NMR spectra before and after melting

## TGA

### Tartaric acid series

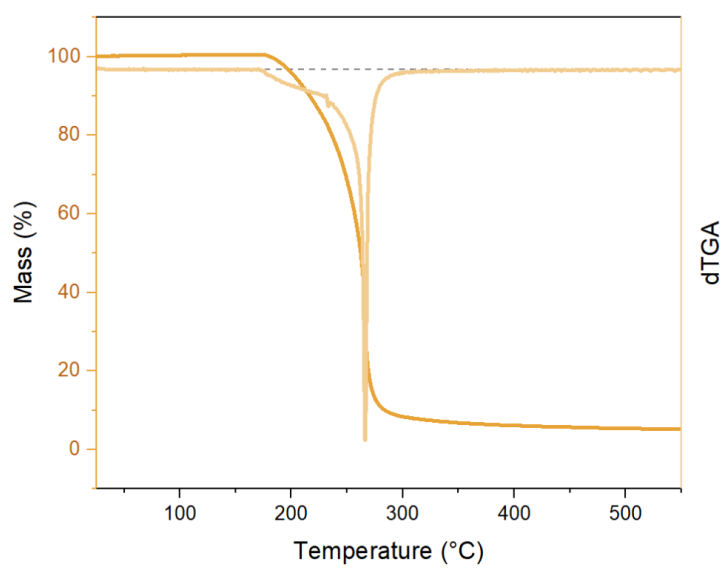

Figure S 13 TGA of L (+)-Tartaric Acid

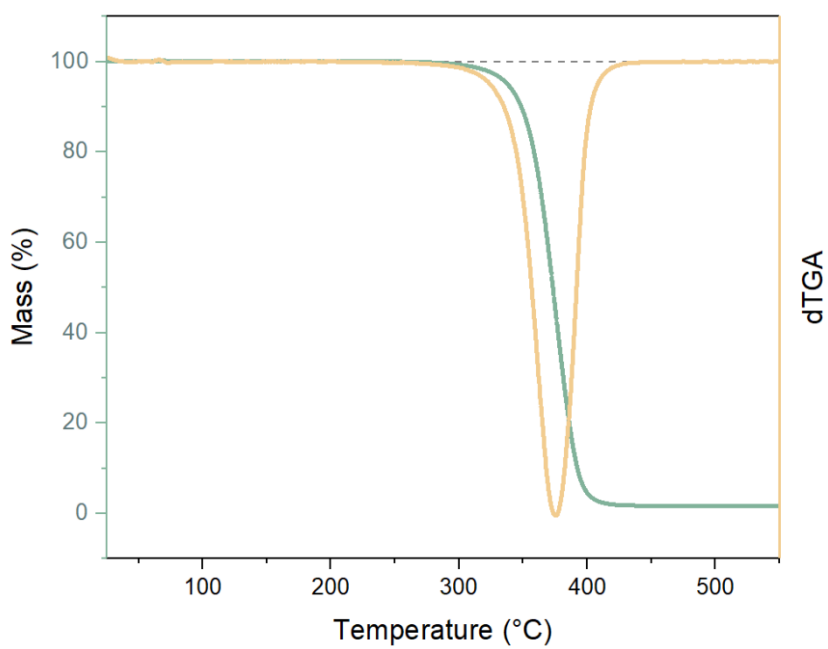

Figure S 14 TGA of (R,R)-di-n-dodecyltartrate

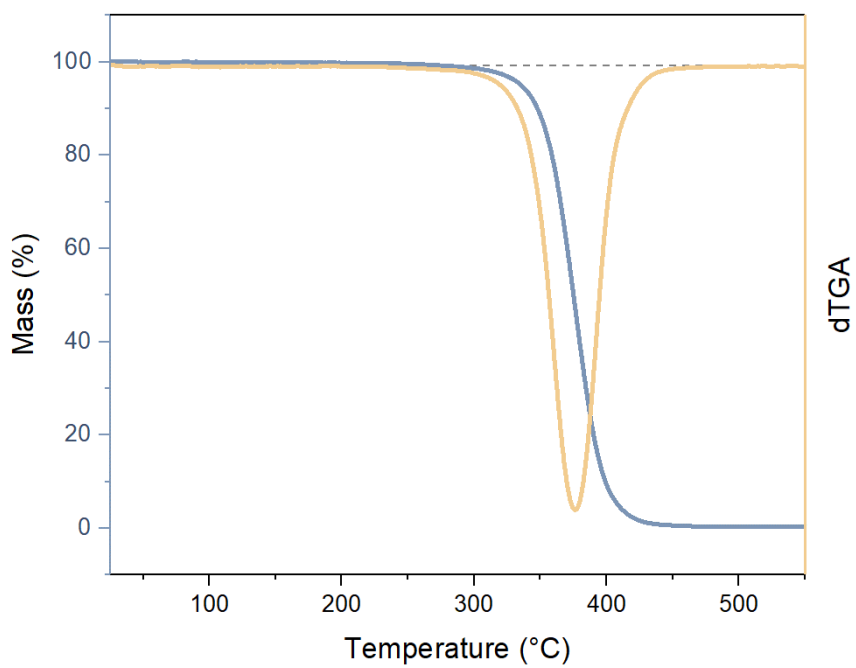

Figure S 15 TGA of (R,R)-di-n-hexadecyltartrate

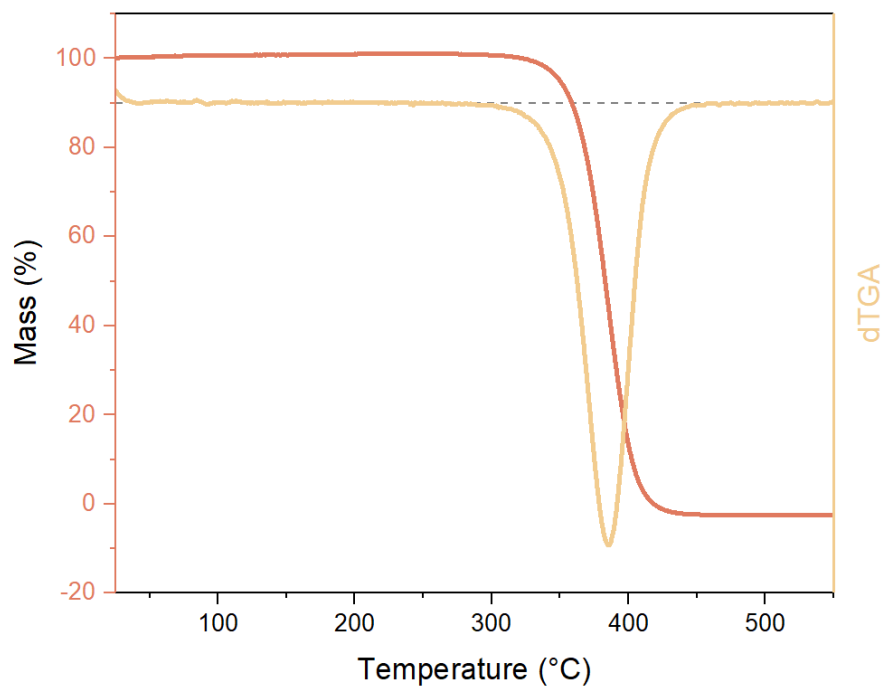

Figure S 16 TGA of (R,R)-di-n-octadecyltartrate

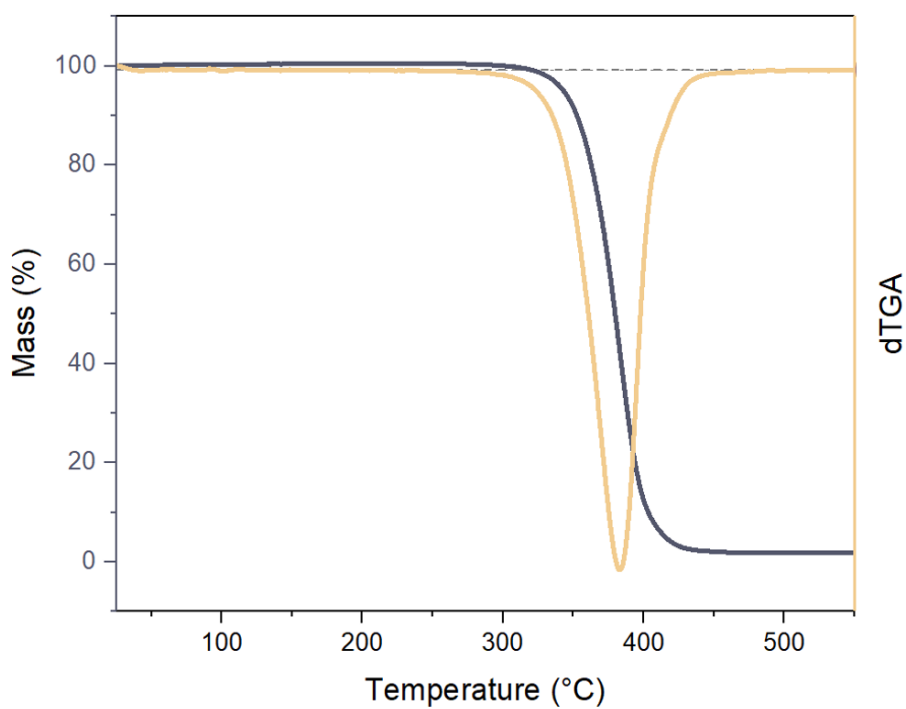

Figure S 17 TGA of (R,R)-di-n-docanosyltartrate

### Mucic acid series

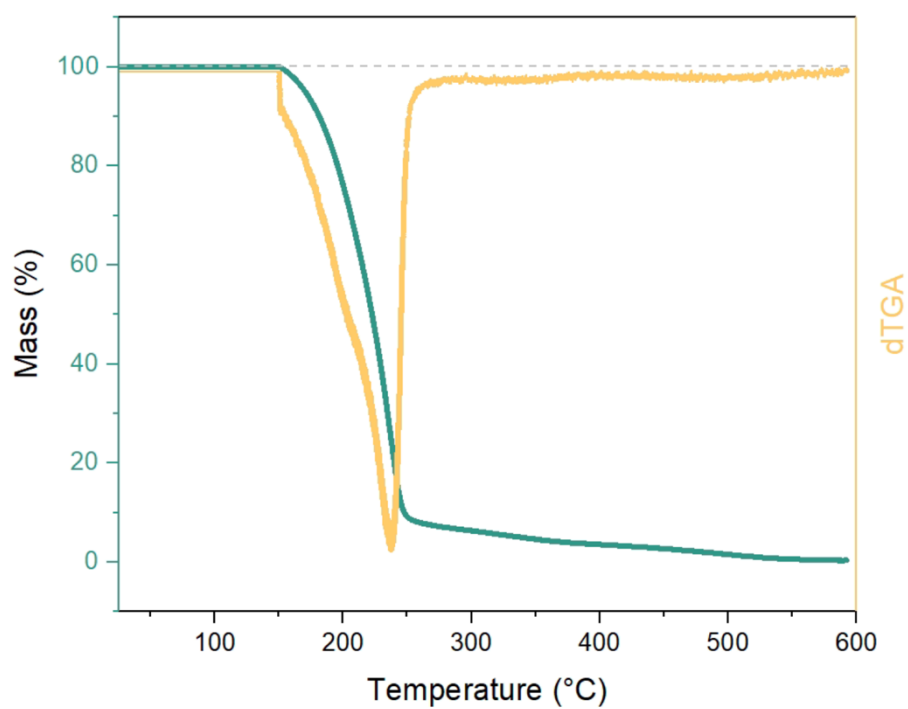

Figure S 18 TGA of di-n-hexadecylmucate

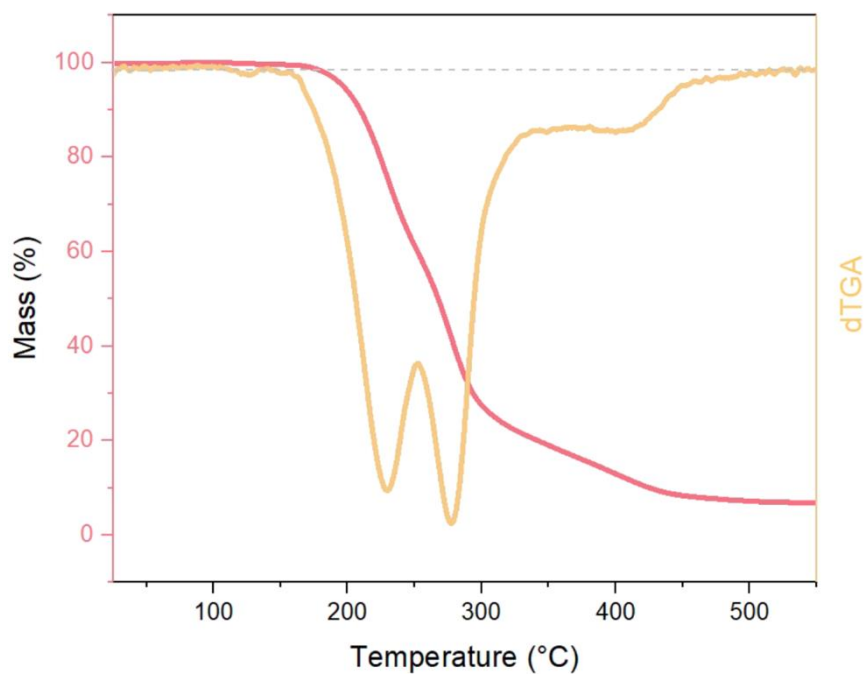

Figure S 19 TGA of di-n-octadecylmucate

## DSC

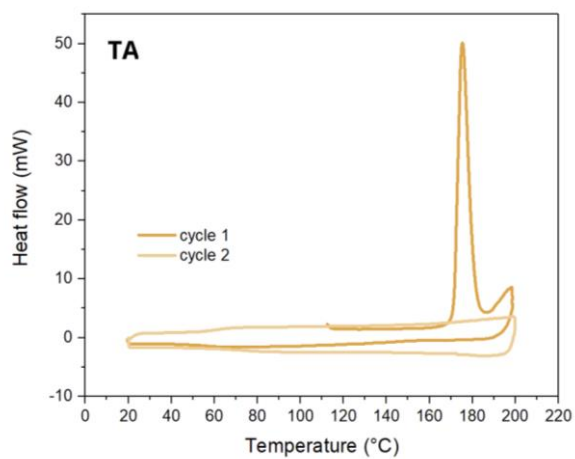

Figure S 20 DSC curve of L(+)-Tartaric Acid

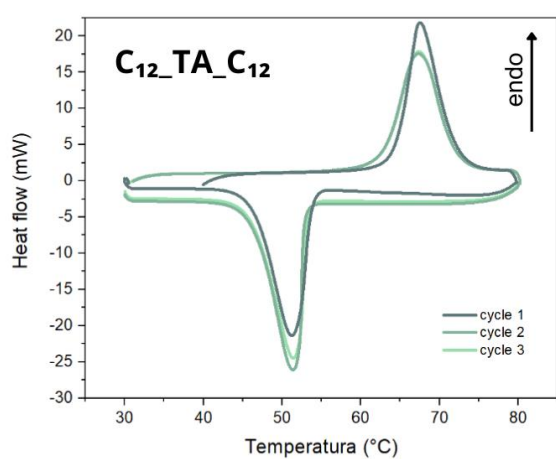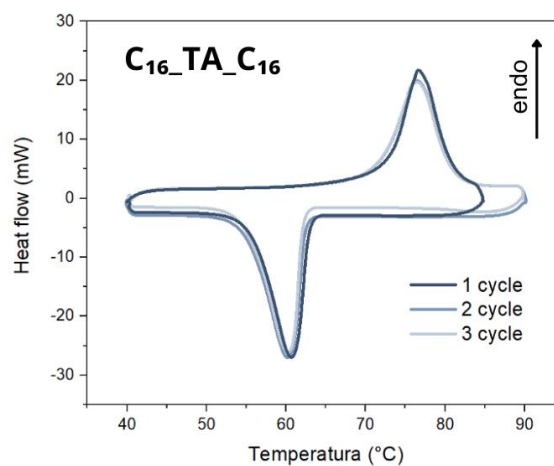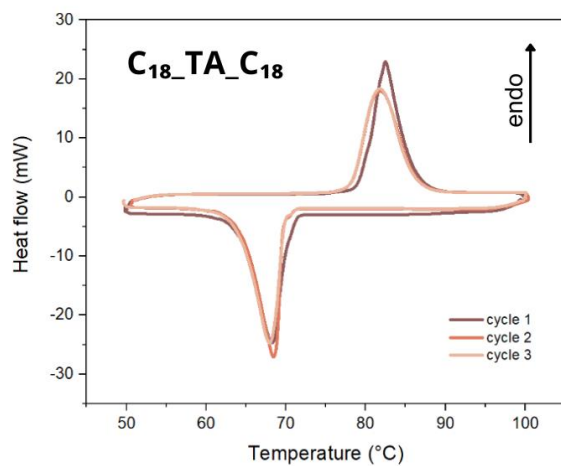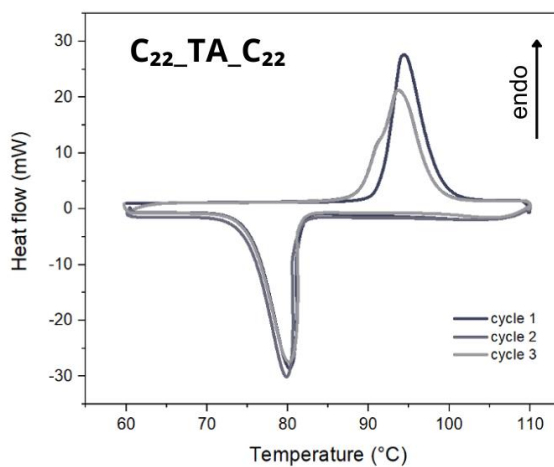

Figure S 21 DSC curves of tartaric acid diester series

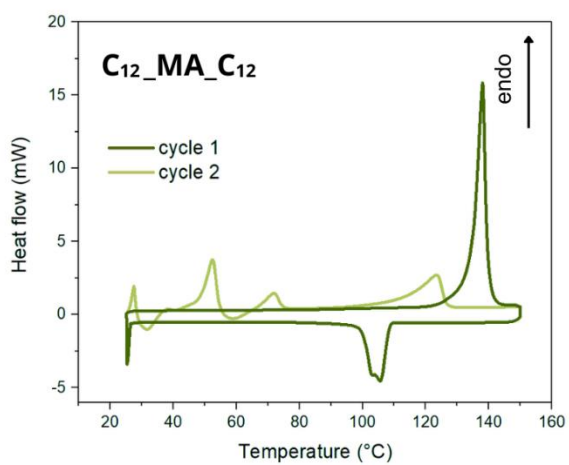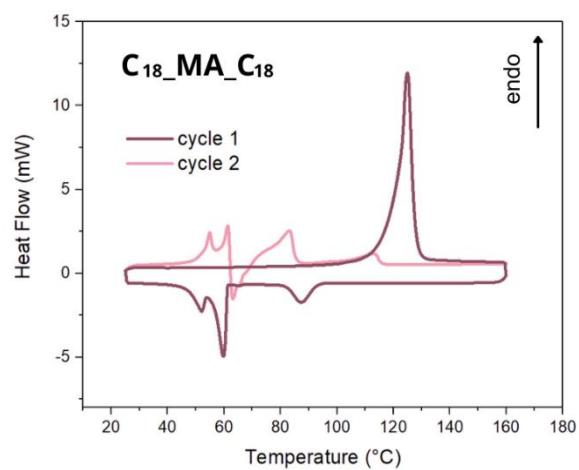

Figure S 22 DSC curves of mucic acid diester series

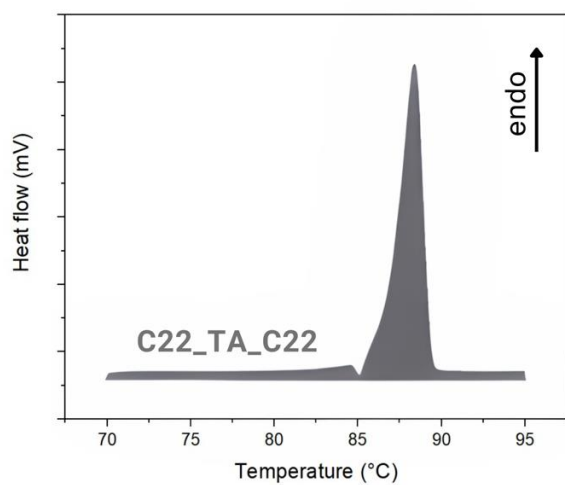

Figure S 23 DSC curve of C22\_TA\_C22, at a ramp rate  $1^{\circ} \text{min}^{-1}$



# FTIR

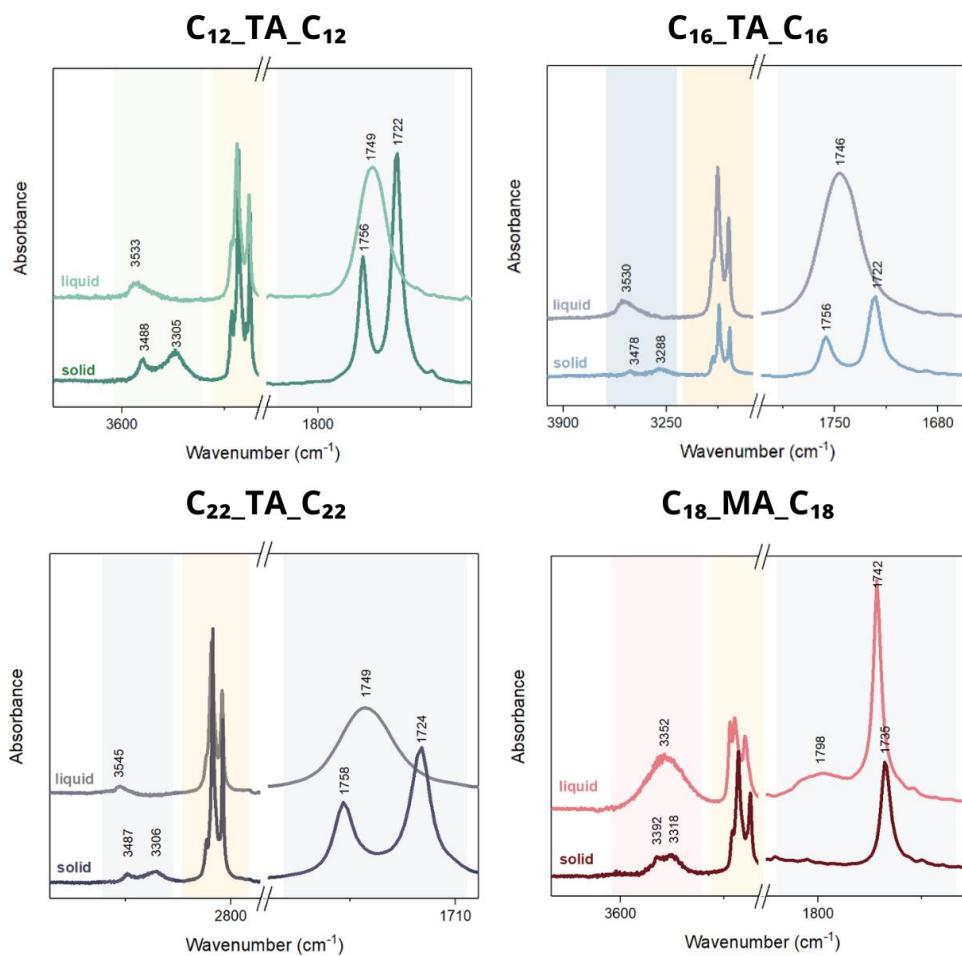

Figure S 24 FT-IR analysis of tartaric acid and mucic acid diester series in solid and liquid state

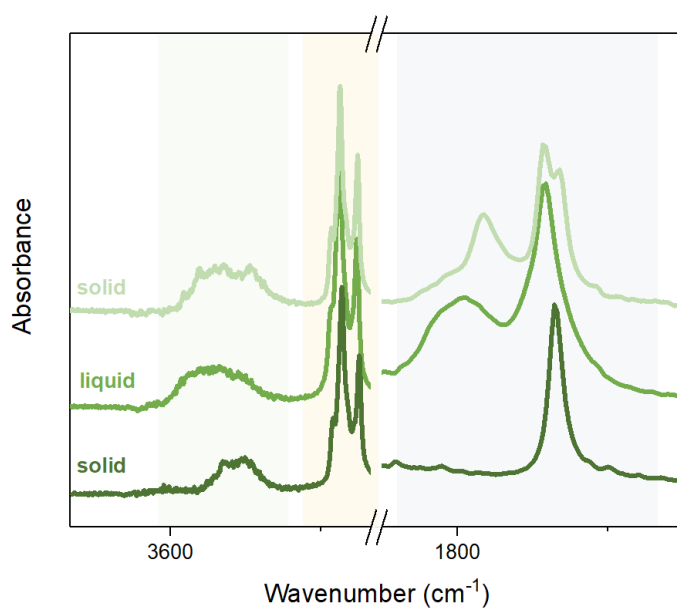

Figure S 25 FT-IR analysis of C<sub>12</sub>\_MA\_C<sub>12</sub>

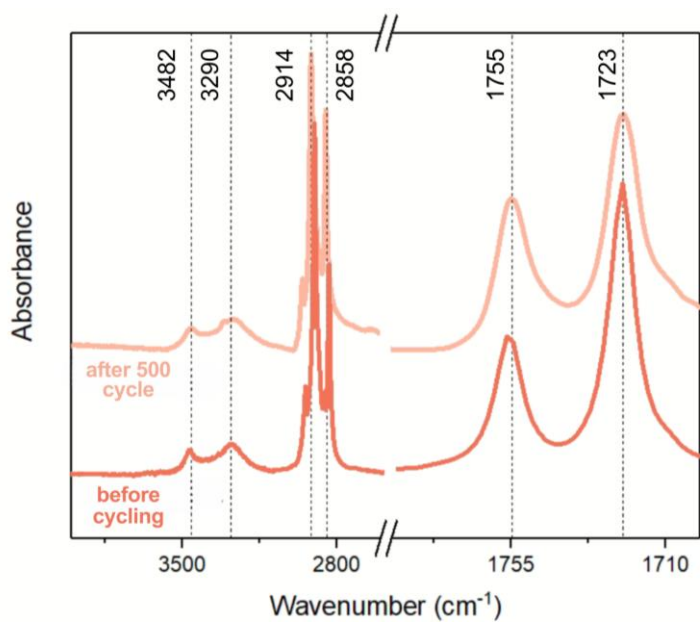

Figure S 26 FT-IR analysis of C18\_TA\_C18 before and after 500 th cycles

## X-ray Crystallography

### Extended crystal packing

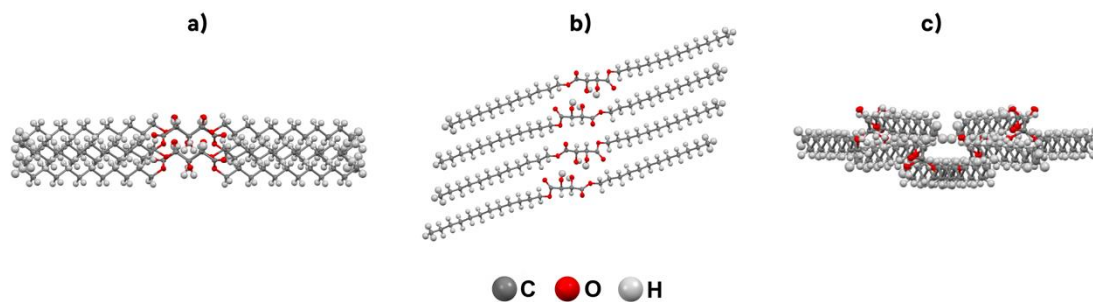

Figure S 27 Extended crystal packing of C12\_TA\_C12 down the a (a), b (b), c (c) axis

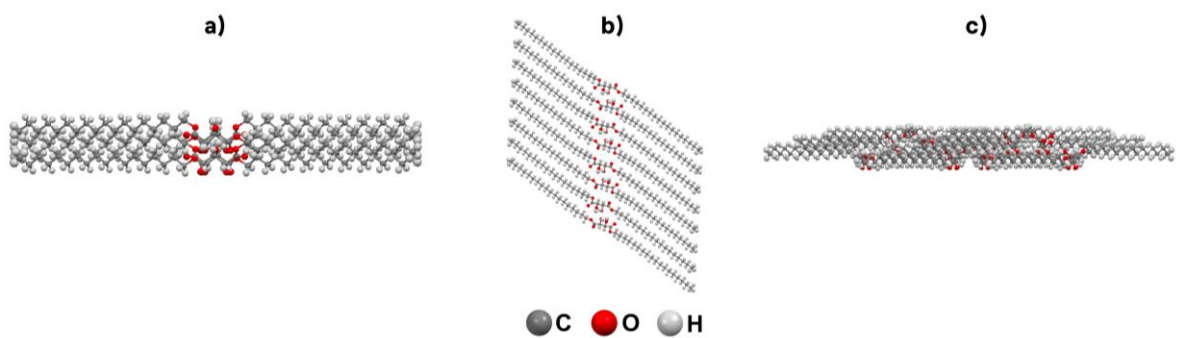

Figure S 28 Extended crystal packing of C18\_TA\_C18 down the a (a), b (b), c (c) axis

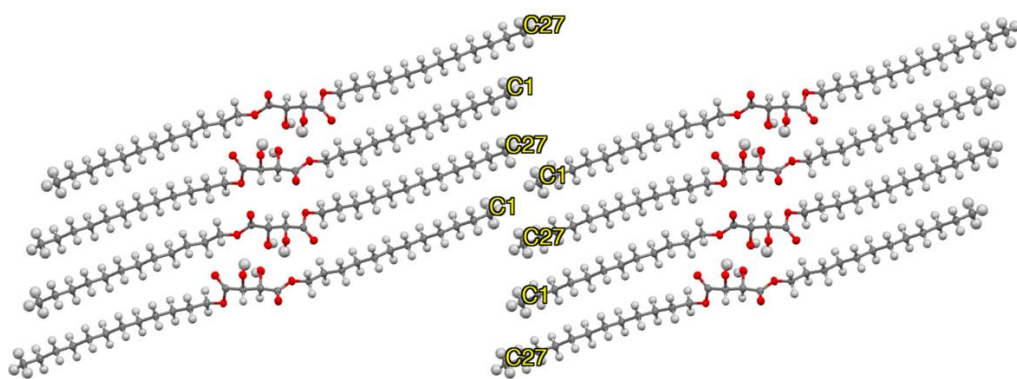

Figure S 29 Extended crystal packing of C12\_TA\_C12 down the b axis

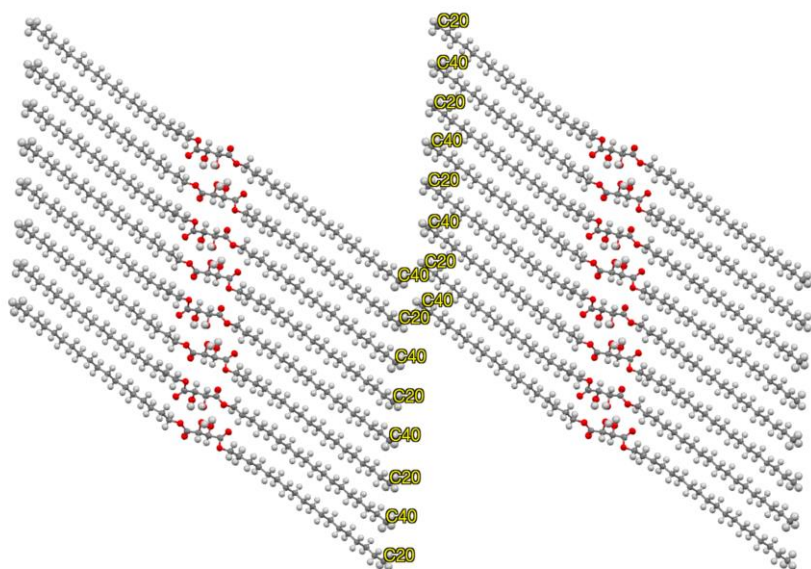

Figure S 30 Extended crystal packing of C18\_TA\_C18 down the b axis

## Crystal data and refinement details

Table S 1 Crystal data and structure refinement for C<sub>12</sub>\_TA\_C<sub>12</sub> and C<sub>18</sub>\_TA\_C<sub>18</sub>

| Identification code                         | C <sub>12</sub> _TA_C <sub>12</sub>                           | C <sub>18</sub> _TA_C <sub>18</sub>                           |
|---------------------------------------------|---------------------------------------------------------------|---------------------------------------------------------------|
| Empirical formula                           | C <sub>28</sub> H <sub>54</sub> O <sub>6</sub>                | C <sub>40</sub> H <sub>78</sub> O <sub>6</sub>                |
| Formula weight                              | 486.737                                                       | 655.02                                                        |
| Temperature                                 | -                                                             | 293(2)                                                        |
| Crystal system                              | monoclinic                                                    | monoclinic                                                    |
| Space group                                 | C2                                                            | C2                                                            |
| a/Å                                         | 17.492(4)                                                     | 18.197(4)                                                     |
| b/Å                                         | 4.754(1)                                                      | 4.7630(10)                                                    |
| c/Å                                         | 34.846(7)                                                     | 45.953(9)                                                     |
| α/°                                         | 90                                                            | 90                                                            |
| β/°                                         | 98.42(3)                                                      | 93.13(3)                                                      |
| γ/°                                         | 90                                                            | 90                                                            |
| Volume/Å <sup>3</sup>                       | 2866.5(10)                                                    | 3976.9(14)                                                    |
| Z                                           | 1                                                             | 4                                                             |
| ρ <sub>calc</sub> /cm <sup>3</sup>          | 1.128                                                         | 1.094                                                         |
| μ/mm <sup>-1</sup>                          | 0.077                                                         | 0.071                                                         |
| F(000)                                      | 1080.7                                                        | 1464.0                                                        |
| Radiation                                   | Mo Kα (λ = 0.71073)                                           | MoKα (λ = 0.71073)                                            |
| 2θ range for data collection/°              | 3.54 to 64.4                                                  | 0.888 to 49.998                                               |
| Index ranges                                | -24 ≤ h ≤ 24, -6 ≤ k ≤ 6, -46 ≤ l ≤ 46                        | -21 ≤ h ≤ 21, -5 ≤ k ≤ 5, -54 ≤ l ≤ 54                        |
| Reflections collected                       | 23610                                                         | 21441                                                         |
| Independent reflections                     | 8137 [R <sub>int</sub> = 0.1179, R <sub>sigma</sub> = 0.1106] | 6683 [R <sub>int</sub> = 0.1003, R <sub>sigma</sub> = 0.0928] |
| Data/restraints/parameters                  | 8137/3/317                                                    | 6683/1/419                                                    |
| Goodness-of-fit on F <sup>2</sup>           | 0.997                                                         | 1.060                                                         |
| Final R indexes [I ≥ 2σ (I)]                | R <sub>1</sub> = 0.0858, wR <sub>2</sub> = 0.2103             | R <sub>1</sub> = 0.0812, wR <sub>2</sub> = 0.2300             |
| Final R indexes [all data]                  | R <sub>1</sub> = 0.0902, wR <sub>2</sub> = 0.2201             | R <sub>1</sub> = 0.1170, wR <sub>2</sub> = 0.2764             |
| Largest diff. peak/hole / e Å <sup>-3</sup> | 0.46/-0.74                                                    | 0.47/-0.39                                                    |
| Flack parameter                             | -0.0(6)                                                       | 1.2(10)                                                       |

## Hydrogen bond tables generated from Olex2

Table S 2 Distance and angles of strong hydrogen bond in C<sub>12</sub>\_TA\_C<sub>12</sub>

| C <sub>12</sub> _TA_C <sub>12</sub> |    |    |                |                  |                    |                   |
|-------------------------------------|----|----|----------------|------------------|--------------------|-------------------|
| D                                   | H  | A  | D-H length [Å] | H···A length [Å] | D-H···A length [Å] | D-H···A angle [°] |
| O4                                  | H3 | O3 | 0.83(2)        | 1.81(2)          | 2.64(2)            | 174(2)            |
| O3                                  | H4 | O4 | 0.89(3)        | 2.21(3)          | 2.83(18)           | 126(3)            |
| <b>Average</b>                      |    |    | 0.86           | 2.01             | 2.74               | 150               |

Table S 3 Distance and angles of strong hydrogen bond in C<sub>18</sub>\_TA\_C<sub>18</sub>

| C <sub>18</sub> _TA_C <sub>18</sub> |    |    |                |                  |                    |                   |
|-------------------------------------|----|----|----------------|------------------|--------------------|-------------------|
| D                                   | H  | A  | D-H length [Å] | H···A length [Å] | D-H···A length [Å] | D-H···A angle [°] |
| O1                                  | H1 | O4 | 0.82           | 2.23             | 2.79               | 123               |
| O4                                  | H4 | O1 | 0.82           | 1.83             | 2.63               | 168               |
| <b>Average</b>                      |    |    | 0.82           | 2.03             | 2.71               | 146               |

## Distances and angles of hydrogen bonds calculated through the Mercury 2021.2.0 software

Table S 4 Distance and angles of hydrogen bond in C<sub>12</sub>\_TA\_C<sub>12</sub>

| C <sub>12</sub> _TA_C <sub>12</sub> |      |    |                |                  |                    |                   |
|-------------------------------------|------|----|----------------|------------------|--------------------|-------------------|
| D                                   | H    | A  | D-H length [Å] | H···A length [Å] | D-H···A length [Å] | D-H···A angle [°] |
| O4                                  | H4   | O1 | 0.89           | 2.57             | 3.07               | 116               |
| C14                                 | H14  | O2 | 0.98           | 2.63             | 3.34               | 129               |
| C15                                 | H15  |    | 0.98           | 2.58             | 3.49               | 155               |
| C16                                 | H16b |    | 0.97           | 2.52             | 3.28               | 135               |
| O4                                  | H3   | O3 | 0.83           | 1.81             | 2.64               | 174               |
| O3                                  | H4   | O4 | 0.89           | 2.21             | 2.82               | 126               |
| C10                                 | H10b | O5 | 0.97           | 2.54             | 3.31               | 136               |
| C11                                 | H11a |    | 0.97           | 2.67             | 3.55               | 148               |
| C12                                 | H12a |    | 0.97           | 2.50             | 3.25               | 134               |
| <b>Average</b>                      |      |    | 0.93           | 2.60             | 3.34               | 139               |

Table S 5 Distance and angles of hydrogen bond in  $C_{18\_TA\_C_{18}}$

| $C_{18\_TA\_C_{18}}$ |      |     |                |                  |                    |                   |
|----------------------|------|-----|----------------|------------------|--------------------|-------------------|
| D                    | H    | A   | D-H length [Å] | H...A length [Å] | D-H...A length [Å] | D-H...A angle [°] |
| O4                   | H4   | O1  | 0.82           | 1.83             | 2.63               | 168               |
| C23                  | H23B | O2  | 0.97           | 2.51             | 3.27               | 135               |
| C24                  | H24A |     | 0.97           | 2.67             | 3.54               | 147               |
| C25                  | H25B |     | 0.97           | 2.61             | 3.38               | 136               |
| O1                   | H1   | O4  | 0.82           | 2.23             | 2.79               | 123               |
| O4                   | H4   | O4' | 0.82           | 2.65             | 3.07               | 114               |
| C3                   | H3A  | O5  | 0.97           | 2.41             | 3.24               | 144               |
| C21                  | H21  |     | 0.98           | 2.65             | 3.34               | 128               |
| O1                   | H1   | O6  | 0.82           | 2.62             | 3.13               | 122               |
| Average              |      |     | 0.94           | 2.75             | 3.13               | 135               |

### Hirshfeld surface interactions breakdown

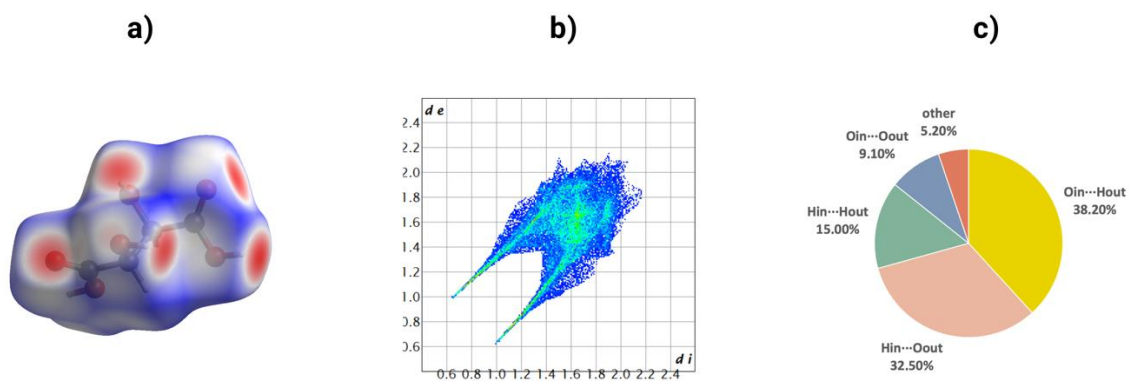

Figure S 31 Hirshfeld surface interactions breakdown for TA. a) 3D Hirshfeld surface b) fingerplot c) percentage of interactions.

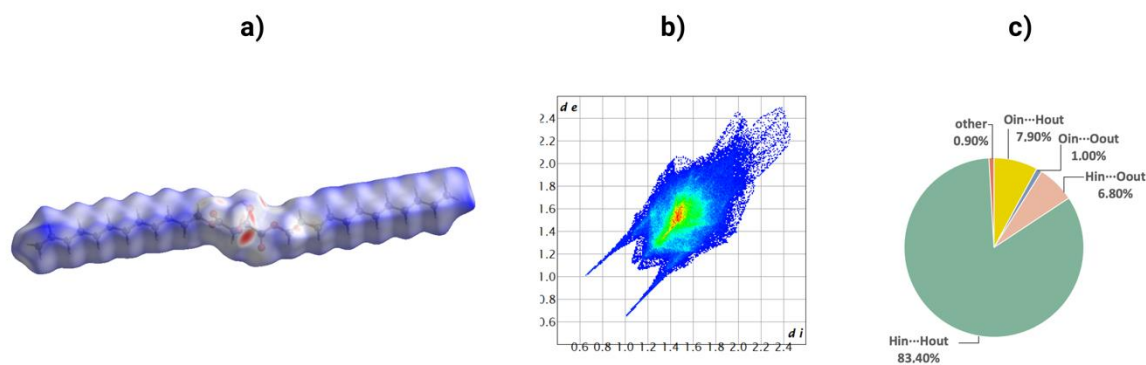

Figure S 32 Hirshfeld surface interactions breakdown for  $C_{12\_TA\_C_{12}}$ . a) 3D Hirshfeld surface b) fingerplot c) percentage of interactions.

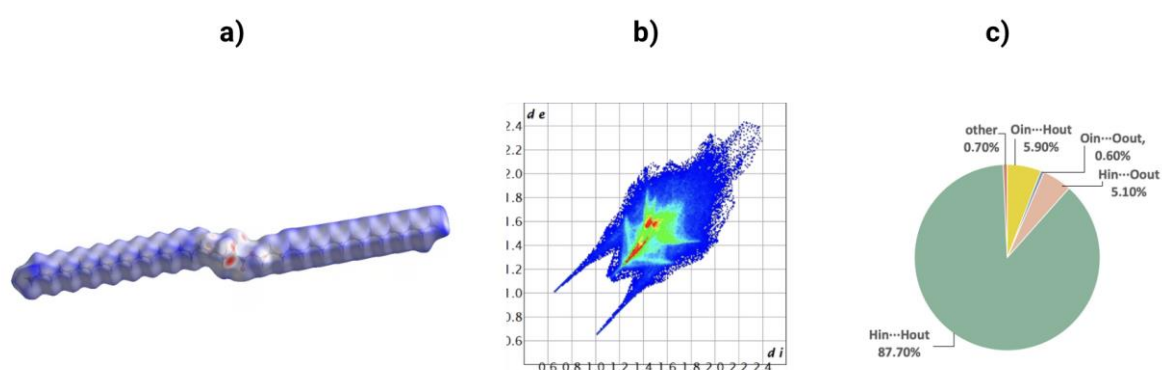

Figure S 33 Hirshfeld surface interactions breakdown for  $C_{18\_TA\_C_{18}}$ . a) 3D Hirshfeld surface b) fingerplot c) percentage of interactions.

Table S 6 The state of the art presenting organic PCMs.

| Compound                  | $T_m$ | $\Delta H_f$ | Biorenewable origin | Ref. |
|---------------------------|-------|--------------|---------------------|------|
| Myristic acid             | 53    | 181          | ✓                   | 1    |
| Palmitic acid             | 61    | 198          |                     |      |
| Stearic acid              | 69    | 202          |                     |      |
| 1-hexadecanol             | 49    | 237          | ✓                   | 2    |
| 1-octadecanol             | 57    | 248          |                     |      |
| Glycerol tristearate      | 64    | 149          | ✓                   | 3    |
| Glycerol tripalmitate     | 59    | 186          |                     |      |
| Glycerol tribehenate      | 82    | 214          |                     |      |
| Erythritol tetrapalmitate | 22    | 201          | ✓                   | 5    |
| Xylitol pentastearate     | 32    | 205          |                     | 6    |
| Galactitol hexastearate   | 50    | 251          |                     | 7    |

|                                         |    |     |   |           |
|-----------------------------------------|----|-----|---|-----------|
| Decyl eicosanate                        | 41 | 232 | ✓ | 8         |
| Tetradecyl octadecanoate                | 49 | 222 | ✓ | 9         |
| Tetradecyl eicosanoate                  | 53 | 201 |   |           |
| Hexadecyl eicosanate                    | 59 | 226 | ✓ | 10        |
| Octadecyl eicosanate                    | 65 | 226 | ✓ | 11        |
| Cutina AGS                              | 60 | 213 | ✓ | 12        |
| Dihexadecyl-1,10-decanedioate           | 58 | 214 | ✓ | 13        |
| Dihexadecyl-1,8- octanedioate           | 55 | 216 | ✓ | 14        |
| N-octadecylstearamide                   | 95 | 155 | X | 15        |
| N-hexadecyl-decanamide                  | 79 | 201 | X | 15        |
| 1-(Decyl sulfonyl) decane               | 89 | 204 | X | 16        |
| Nonacosane                              | 63 | 240 | X | 17        |
| Tetratriacontane                        | 76 | 269 | X | 17        |
| <b>C<sub>18</sub>_TA_C<sub>18</sub></b> | 82 | 221 | ✓ | this work |
| <b>C<sub>22</sub>_TA_C<sub>22</sub></b> | 94 | 203 | ✓ | this work |

## Literature

- 1 N. Wan, Y.-Y. Jia, Y.-L. Hou, X.-X. Ma, Y.-S. He, C. Li, S.-Y. Zhou and B.-L. Zhang, *Preparation, Physicochemical Properties, and Transfection Activities of Tartaric Acid-Based Cationic Lipids as Effective Nonviral Gene Delivery Vectors*, 1112, vol. 39.
- 2 J.F. Carson, *J Am Chem Soc.*
- 3 A. Sari, *Energy Convers Manag*, 2003, **44**, 2277–2287.
- 4 Q. Zhang, H. Yan, Z. Zhang, J. Luo, N. Yin, Z. Tan and Q. Shi, *Materials Today Sustainability*, 2021, **11–12**, 100064.
- 5 A. Sar, A. Bier, A. Karaipekli, C. Alkan and A. Karadag, *Solar Energy Materials and Solar Cells*, 2010, **94**, 1711–1715.
- 6 C. K. Zéberg-Mikkelsen and E. H. Stenby, *Fluid Phase Equilib*, 1999, **162**, 7–17.
- 7 A. Sari, R. Eroglu, A. Biçer and A. Karaipekli, *Chem Eng Technol*, 2011, **34**, 87–92.
- 8 A. Biçer and A. Sar, *Solar Energy Materials and Solar Cells*, 2012, **102**, 125–130.
- 9 A. Sari, A. Biçer, Ö. Lafçi and M. Ceylan, *Solar Energy*, 2011, **85**, 2061–2071.
- 10 R. Ravotti, O. Fellmann, N. Lardon, L. J. Fischer, A. Stamatiou and J. Worlitschek, *Appl. Sci.*, 2019, **9(2)**, 225
- 11 A. A. Aydn and H. Okutan, *Solar Energy Materials and Solar Cells*, 2011, **95**, 2752–2762.



- 12 A. A. Aydın and A. Aydın, *Solar Energy Materials and Solar Cells*, 2012, **96**, 93–100.
- 13 A. Alper Aydın, *Solar Energy Materials and Solar Cells*, 2013, **113**, 44–51.
- 14 A. A. Aydın, *Solar Energy Materials and Solar Cells*, 2013, **108**, 98–104.
- 15 A. A. Aydın and N. Çalık, *Solar Energy Materials and Solar Cells*, 2024, **269**, 112785.
- 16 A. A. Aydın and G. Toprakçı, *Solar Energy Materials and Solar Cells*, 2021, **220**, 110822.
